# Supplementary material
Source: HighWire-hosted journal article supplement (https://www.cmaj.ca/highwire/filestream/60003/field_highwire_adjunct_files/0/160487-image-1-at.pdf)
Supplement: 160487-image-1-at.pdf [file 160487-image-1-at.pdf]

**Appendix 1 (as supplied by the authors): Sagittal MRI scan of the neck and upper thoracic region**

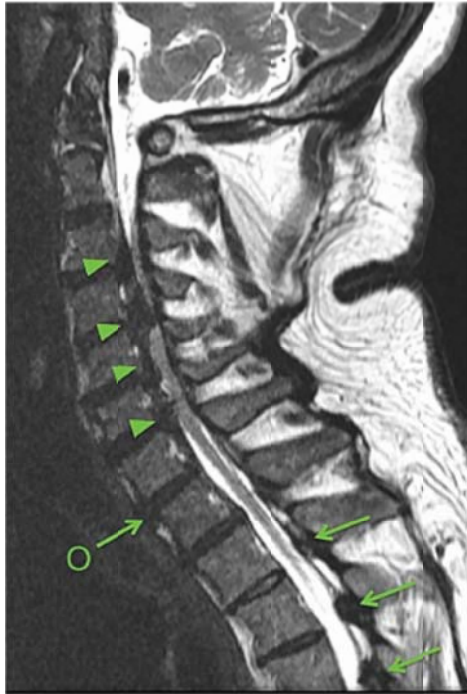

A sagittal T2-weighted MRI scan of the neck and upper thoracic region. Cervical spinal cord compression due to canal stenosis from ossification of the posterior longitudinal ligament is clearly evident between C3-7 (Arrowheads). Less clearly but notable is the ossification of the anterior longitudinal ligament (O). Enlargement and ossification of the ligamentum flavum is present in the upper thoracic region, and is most clearly evident between T2-4 (arrows).
